# Supplementary material
Source: PubMed Central journal article supplement (PMC7323325)
Supplement: ANS-90-1242-s001.pdf [file ANS-90-1242-s001.pdf]

Figure S2

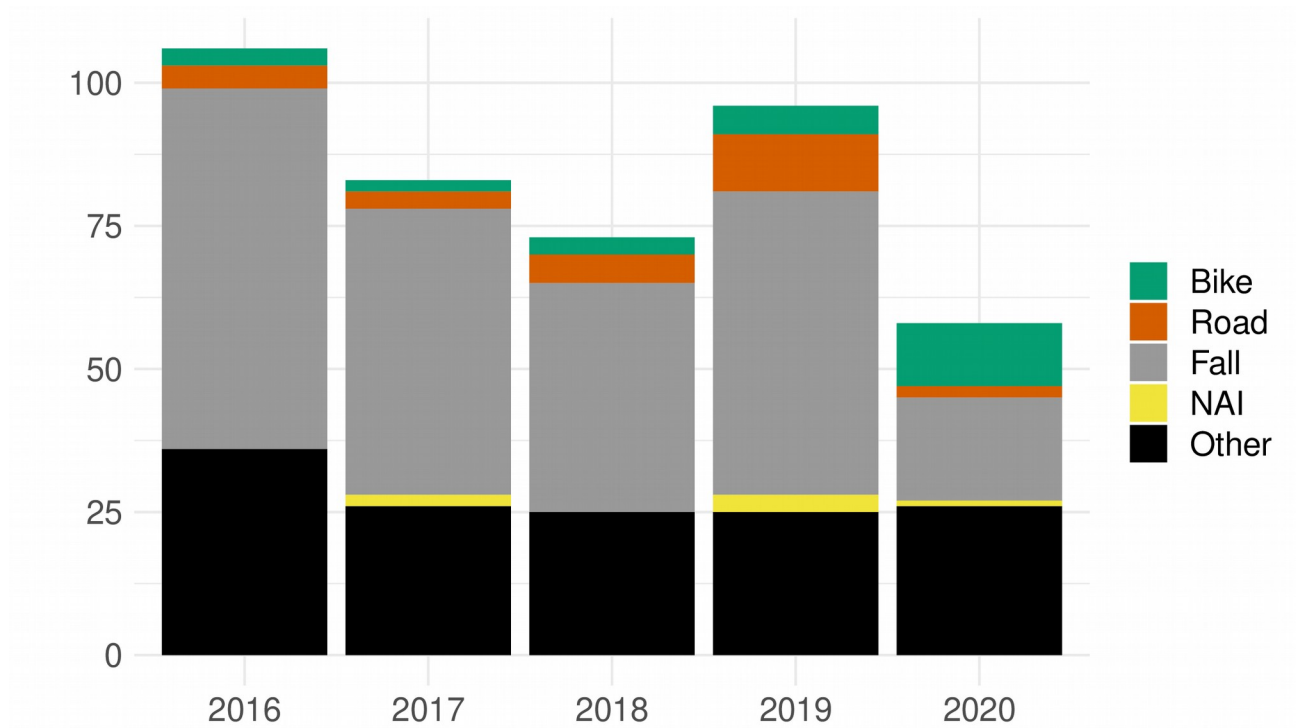

Bar chart of the number of trauma patients admitted during the time period, 26 March - 27 April, for the last five years. In 2020, this time period encompassed the Covid-19 'Level 4' lockdown. Note the reduction in total admissions and changes in the cause of injury during the lockdown. NAI, non-accidental injury.
