# Supplementary material
Source: PubMed Central journal article supplement (PMC7323325)
Supplement: ANS-90-1242-s002.pdf [file ANS-90-1242-s002.pdf]

# Starship Children's Trauma Registry Criteria

## Entry criteria

Data is collected on all patients admitted to hospital following injury with the following exceptions:\*

- Injuries that are the result of pathological conditions
- Late trauma transfers. Where a patient is transferred from another hospital where their initial treatment was expected to have been definitive
- Admission for injuries that occurred one week or more prior to the time of presentation to hospital
- Admissions to the Day Stay Unit that require no overnight stay
- Admissions for complications associated with an injury (e.g., cellulitis from a minor cut)

## Major trauma

The criteria for "major trauma" are:

- Injury Severity Score >15 (AIS 1998 version) or
- Admission to the Paediatric Intensive Care Unit or
- Death in the Emergency Department or during admission.

\* Drownings and hangings were previously excluded but, since January 2020, have been included in the trauma registry.
