# Supplementary material
Source: PubMed Central journal article supplement (PMC7323325)
Supplement: ANS-90-1242-s003.pdf [file ANS-90-1242-s003.pdf]

Figure S1

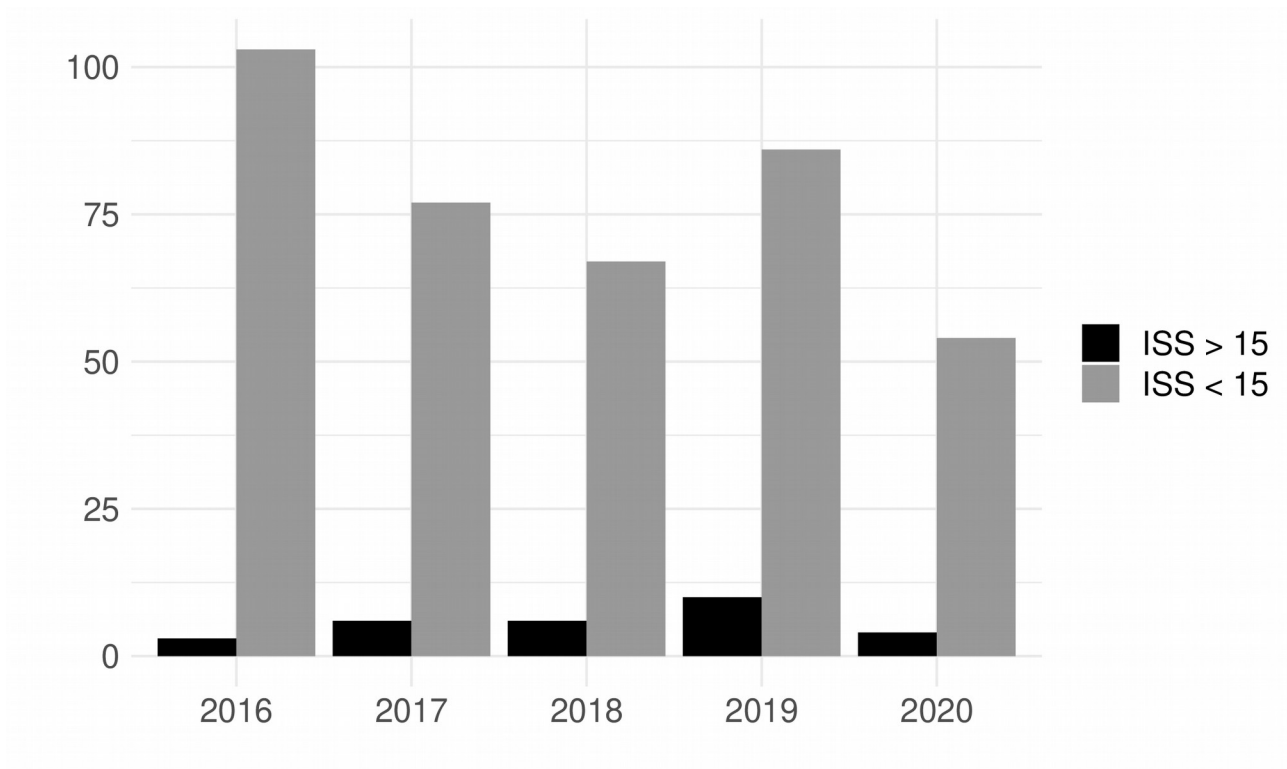

Bar chart of the number of trauma patients admitted during the time period, 26 March - 27 April, for the last five years. In 2020, this time period encompassed the Covid-19 'Level 4' lockdown. Black bars, injury severity score (ISS) > 15, 'major' trauma; grey bars, ISS < 15, not 'major' trauma.
